# Supplementary material
Source: PubMed Central journal article supplement (PMC1864952)

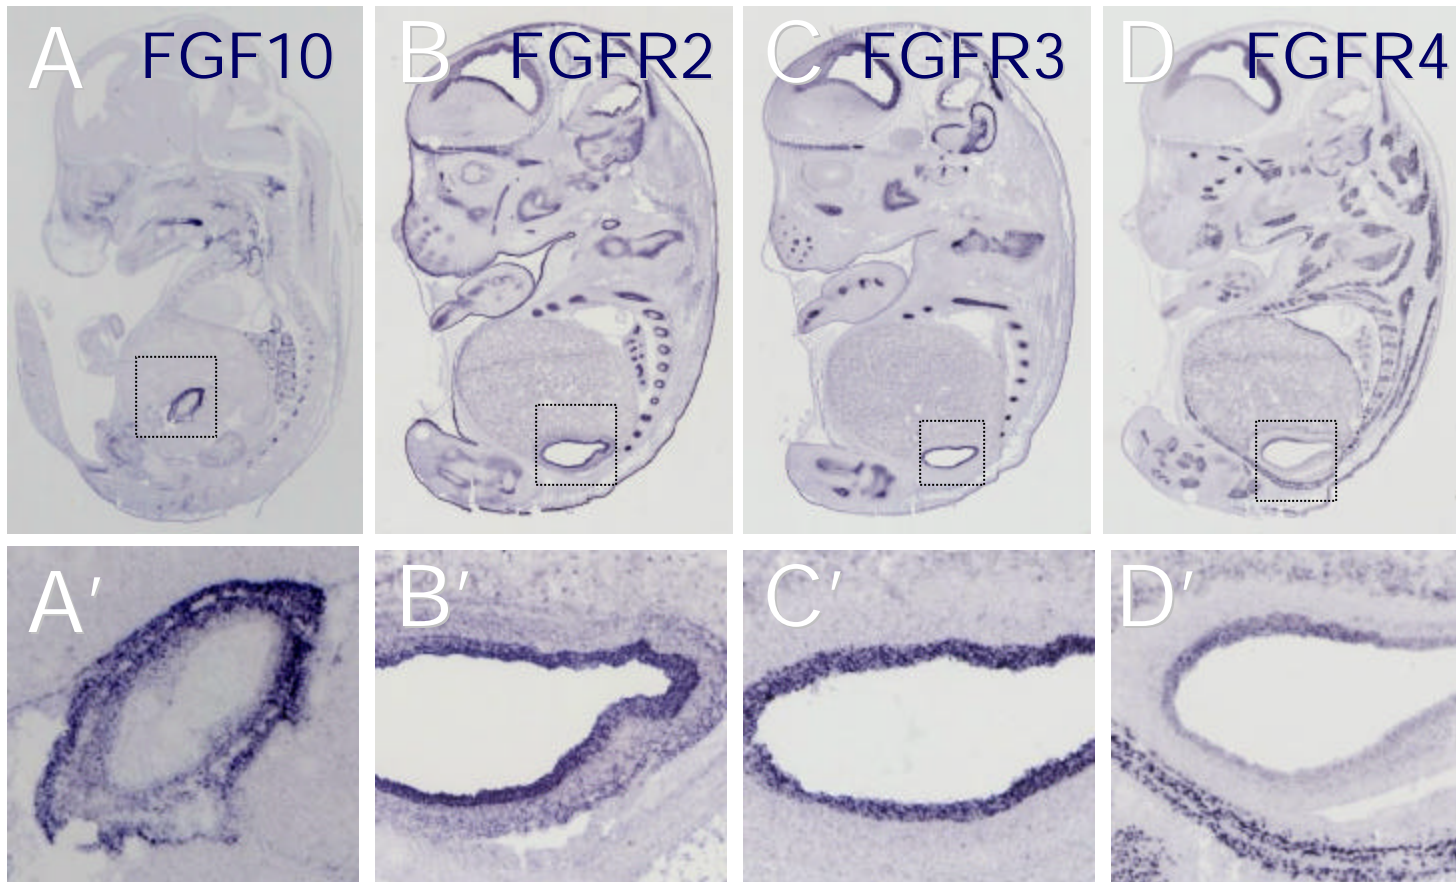

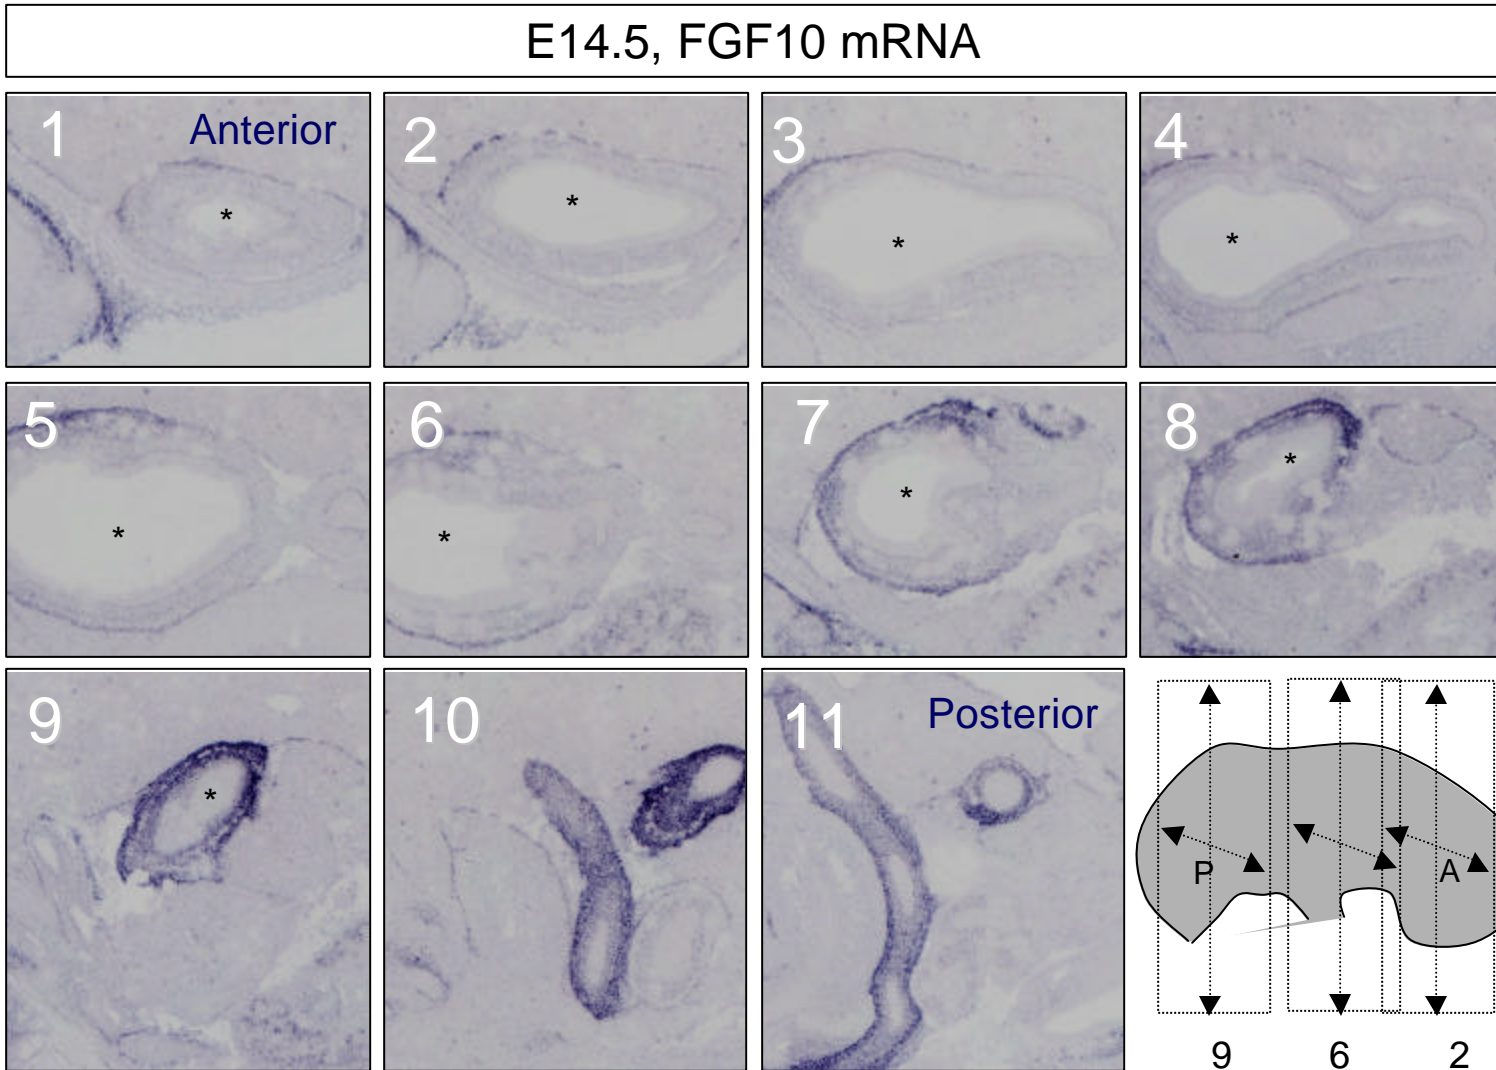

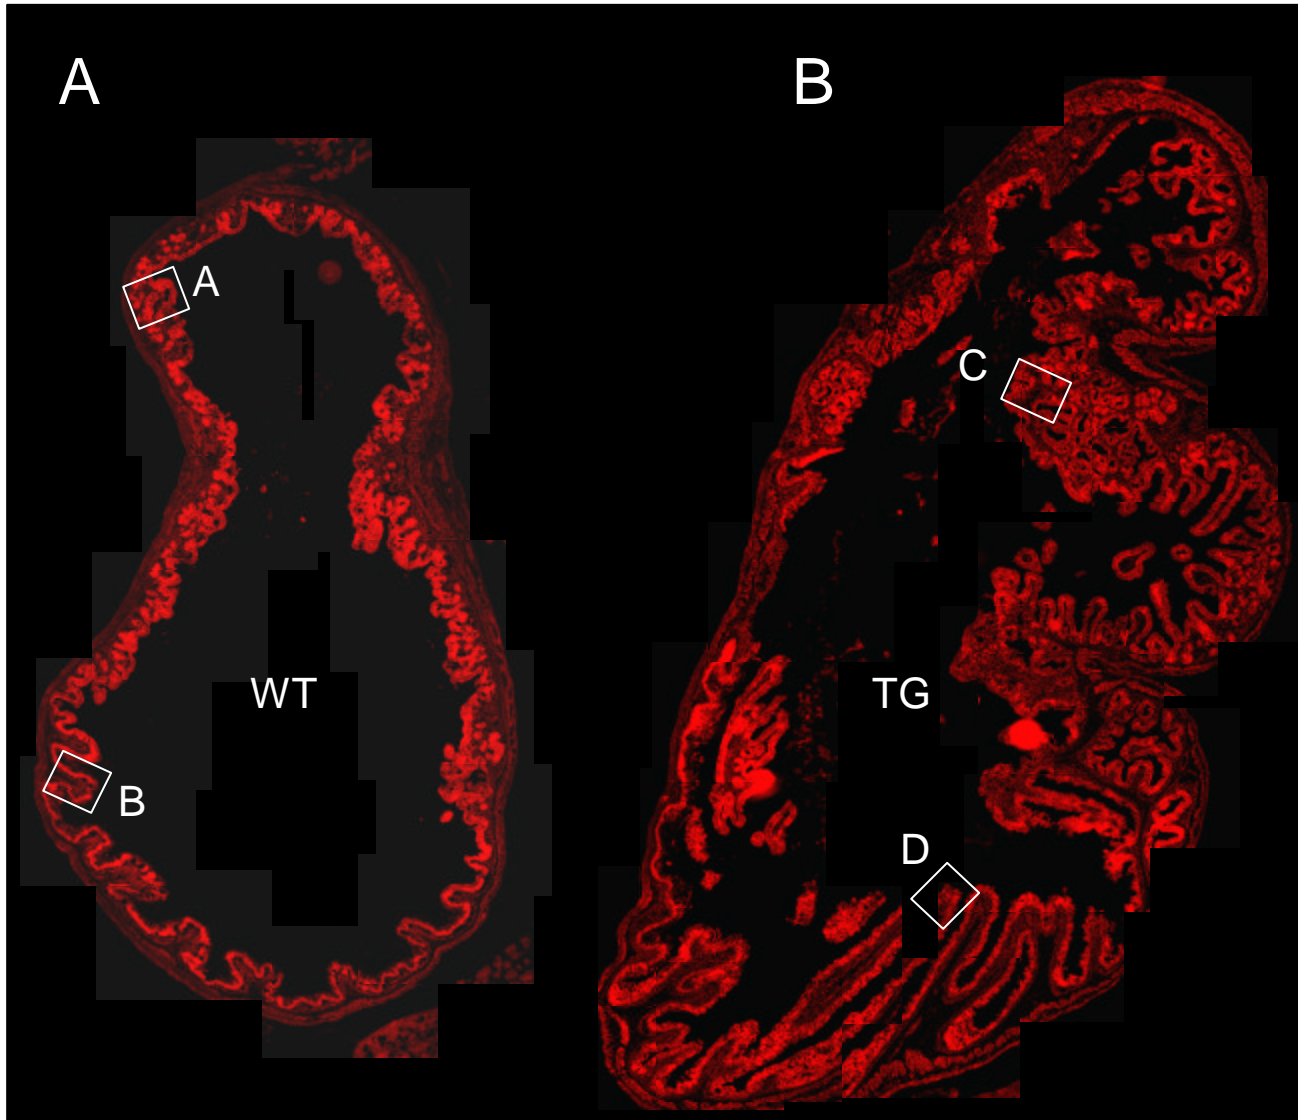

Nyeng et al. Supp. Fig. 3

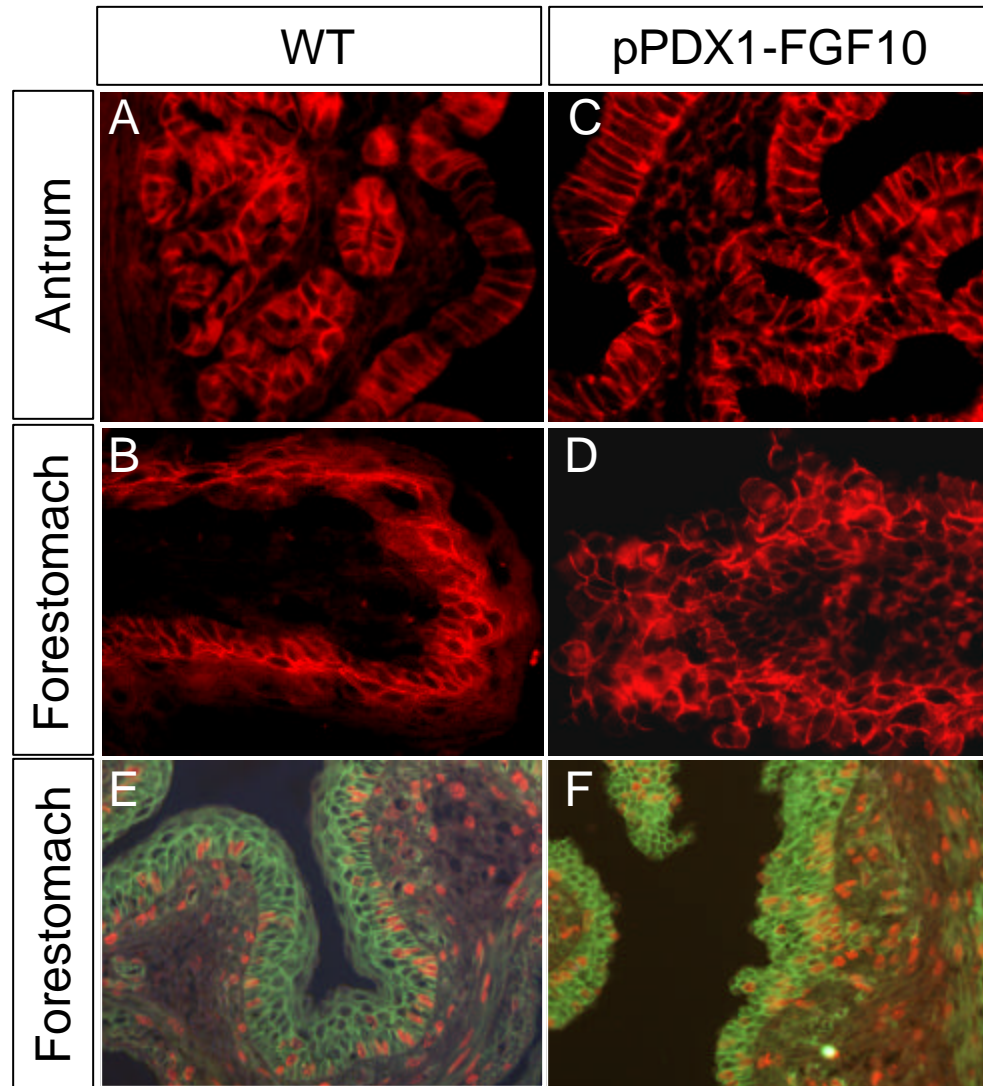

Nyeng et al. Supp. Fig. 4



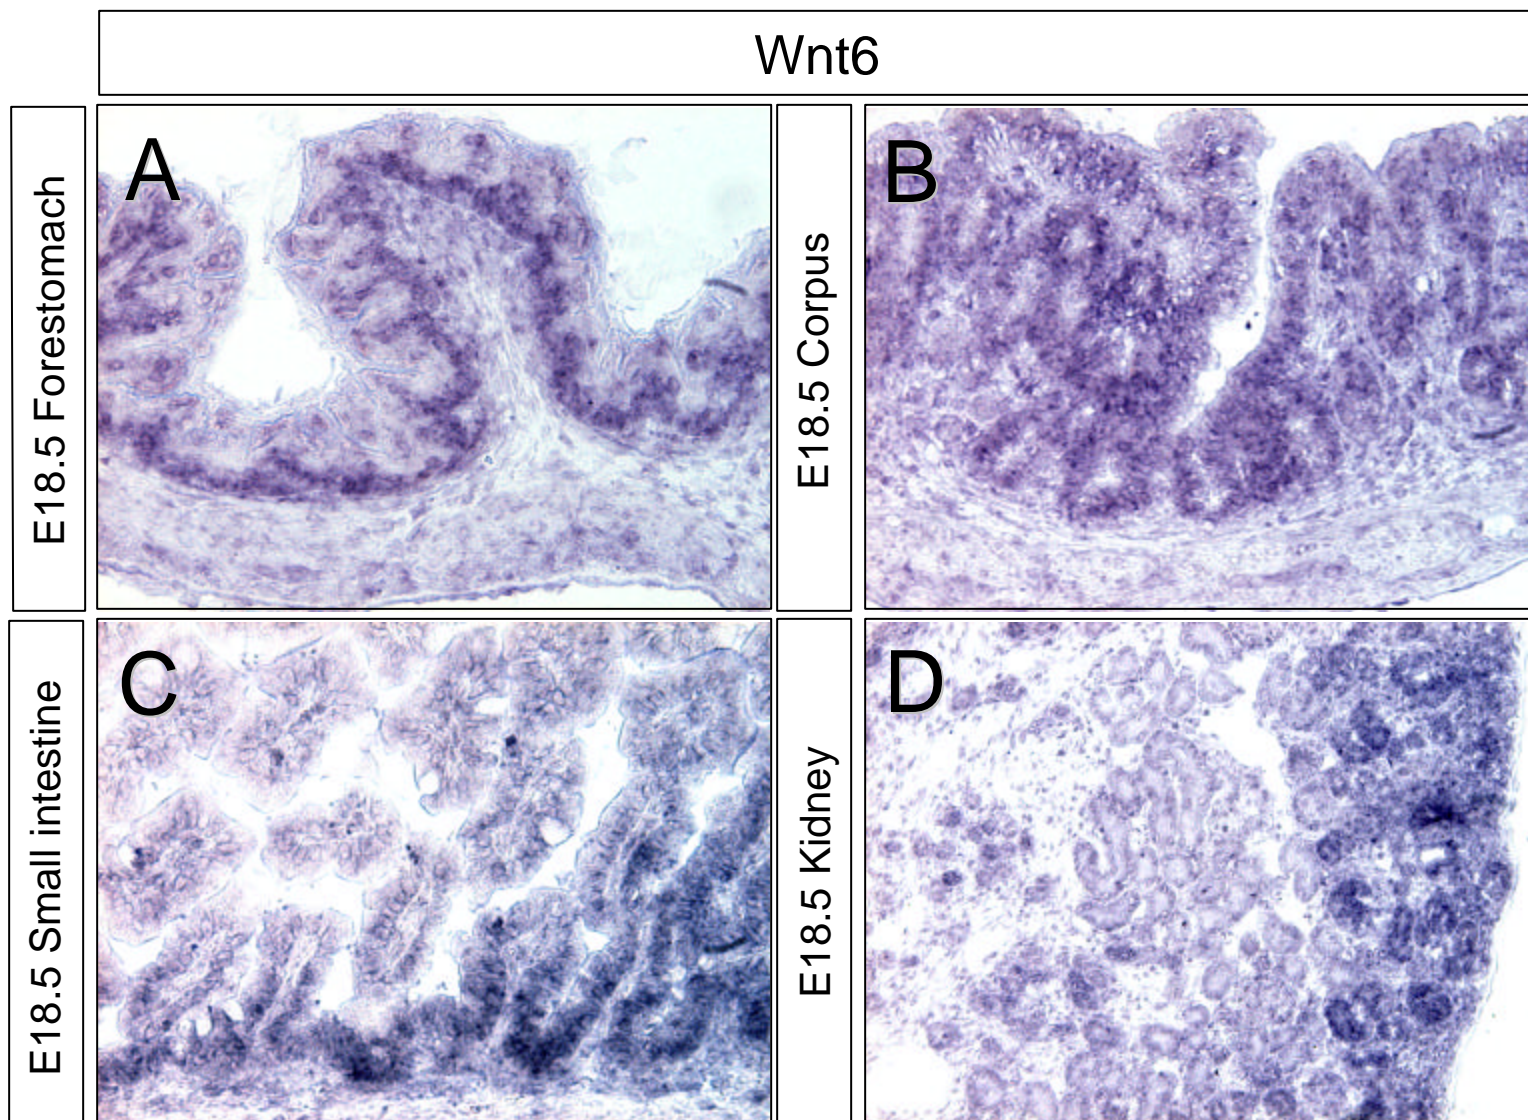

Nyeng et al. Supp. Figure 5

Supplement: NIHMS19042-supplement-01.pdf [file NIHMS19042-supplement-01.pdf]
